# Supplementary material for: High-Efficiency Multi-site Genomic Editing of Pseudomonas putida through Thermoinducible ssDNA Recombineering
Source: PubMed Central journal article supplement — iScience. 2020 Feb 26;23(3):100946. doi: 10.1016/j.isci.2020.100946 (PMC7068128; doi:10.1016/j.isci.2020.100946), 2020-02-26
Supplement: mmc1.pdf [file mmc1.pdf]

iScience, Volume 23

## Supplemental Information

### High-Efficiency Multi-site Genomic Editing of *Pseudomonas putida* through Thermoinducible ssDNA Recombineering

Tomas Aparicio, Akos Nyerges, Esteban Martínez-García, and Víctor de Lorenzo

**SUPPLEMENTARY INFORMATION**

## TRANSPARENT METHODS

*Strains and media*

The bacterial strains employed in this study are listed in Supplementary Table S2. *E. coli* and *P. putida* strains were grown in liquid LB with shaking (170 rpm) at 37 °C and 30 °C, respectively (Sambrook et al., 1989) with the exception of *E. coli* strains bearing SEVA plasmids endowed with the  $P_{L}/cl857$  thermo-inducible expression system (cargo #14; i.e. pSEVA2514-*rec2-mutL*<sub>E36K<sup>PP</sup></sub> and derivatives), which were grown at 30 °C to avoid promoter activation. After electroporation, recovery during recombineering experiments was performed in Terrific Broth without glycerol (TB: 12 g L<sup>-1</sup> tryptone, 24 g L<sup>-1</sup> yeast extract, 2 g L<sup>-1</sup> KH<sub>2</sub>PO<sub>4</sub>, 9.4 g L<sup>-1</sup> K<sub>2</sub>HPO<sub>4</sub>). M9 minimal media was prepared according to (Sambrook et al., 1989). Solid media was prepared adding 15 g L<sup>-1</sup> of agar to liquid media. M9 solid media was supplemented with 0.2% (w/v) citrate and appropriate antibiotics to select *P. putida* cells in mating experiments. Liquid and solid media were added, when necessary, with 50 µg ml<sup>-1</sup> of kanamycin (Km), 15 µg ml<sup>-1</sup> of gentamicin (Gm) for *P. putida* and 10 µg ml<sup>-1</sup> of the same antibiotic for *E. coli*, 30 µg ml<sup>-1</sup> of chloramphenicol (Cm), 100 µg ml<sup>-1</sup> of streptomycin (Sm), 100 µg ml<sup>-1</sup> of rifampicin (Rif), 50 µg ml<sup>-1</sup> of nalidixic acid (Nal), 20 µg ml<sup>-1</sup> of Uracil (Ura), 250 µg ml<sup>-1</sup> of 5-fluoroorotic acid (5-FOA) and 5 mM of benzoic acid (pH 11). For screening of fluorescent colonies, LB solid media was prepared with 1 mg ml<sup>-1</sup> of activated charcoal (Sigma-Aldrich Ref. C9157-500G) in order to better discriminate low-signal colonies. Activated charcoal was added to the LB-Agar prior autoclaving and the media poured into 150 mm Petri dishes after vigorous shaking to evenly distribute the insoluble charcoal particles.

*General procedures, primers and bacterial transformation*

Standard DNA manipulations were carried out following routine protocols (Sambrook et al., 1989) and according to manufacturer recommendations. Isothermal Assembly was performed with Gibson Assembly® Master Mix (New England Biolabs, Ipswich, MA, USA). Plasmidic DNA was

purified with the QIAprep® Spin Miniprep Kit, both purchased from Qiagen (Valencia, CA, USA). DNA Amplitools Master Mix (Biotools, Madrid, Spain) was used for diagnosis PCRs and amplification of DNA fragments for cloning purposes was done with Q5 polymerase (New England Biolabs, Ipswich, MA, USA). Synthetic oligonucleotides used in this study are listed in Supplementary Table S1 and were purchased from Sigma-Aldrich (St. Louis, MO, USA). PCR products were purified with the Nucleospin® Gel and PCR Clean-up Kit (Macherey-Nagel, Düren, Germany). DNA sequencing was performed in Macrogen (Spain). Transformation of *E. coli* strains was carried out with chemically competent cells using the CaCl<sub>2</sub> method (Sambrook et al., 1989). Plasmids were introduced in *P. putida* strains via tripartite mating as described in (Martinez-Garcia and de Lorenzo, 2012) and selected in solid M9 minimal media supplemented with 0.2% w/v citrate and appropriate antibiotics. Tetra-parental mating was used as described by (Choi et al., 2005) to insert the mini-transposon Tn7-M-*P*<sub>EM7</sub>-*gfp*-RBS<sup>-</sup> into the *att*Tn7 site of *P. putida* EM42, using M9-citrate-Gm as selective media (see below for details).

#### *Construction of plasmids and strains.*

The medium-high copy number plasmid pSEVA2514-*rec2*-*mut*<sub>L<sub>E36K</sub></sub><sup>PP</sup> (Supplementary Table S2) was used for the construction of two derivatives bearing low- and medium- copy number origins of replication. This plasmid was cut with *PacI*/*SpeI* and the 4.2 Kb DNA band, containing the *rec2* and *mut*<sub>L<sub>E36K</sub></sub><sup>PP</sup> genes under the control of the thermo-inducible system *P*<sub>L/cI857</sub>, was ligated to *PacI*/*SpeI* restricted plasmids pSEVA221 (low copy number) and pSEVA231 (medium copy number). Ligations were transformed into *E. coli* CC118 and selection was made in LB-Km plates, obtaining plasmids pSEVA2214-*rec2*-*mut*<sub>L<sub>E36K</sub></sub><sup>PP</sup> and pSEVA2314-*rec2*-*mut*<sub>L<sub>E36K</sub></sub><sup>PP</sup>. Both constructs were separately introduced in *P. putida* EM42 by tri-parental matings followed by selection in M9-citrate-Km solid media, obtaining the strains *P. putida* EM42 (pSEVA2214-*rec2*-*mut*<sub>L<sub>E36K</sub></sub><sup>PP</sup>) and *P. putida* EM42 (pSEVA2314-*rec2*-*mut*<sub>L<sub>E36K</sub></sub><sup>PP</sup>). *P. putida* EM42 was also transformed by the same method with pSEVA2314, generating the control strain *P. putida* EM42 (pSEVA2314). A Tn7 mini-transposon with the *gfp* gene under the control of the constitutive *P*<sub>EM7</sub> promoter, but lacking the ribosome binding site (RBS) sequence, was constructed. To this end, first the *gfp* gene was placed under the control of the *P*<sub>EM7</sub> promoter: plasmid pSEVA637 (Supplementary Table S2) was cut with *HindIII*/*SpeI* and the purified 0.7 Kb band (RBS + *gfp*

gene) was ligated to the pSEVA237R-PEM7 (Supplementary Table S2) backbone digested with HindIII/SpeI. Upon transformation in *E. coli* CC118 and selection on LB-Km plates, the resulting plasmid (pSEVA237-PEM7) was digested with PacI/SpeI and the purified 0.9 Kb band (containing the *gfp* gene under the control of the  $P_{EM7}$  and bearing a consensus 5'-AGGAGG-3' RBS sequence) was ligated to a pTn7-M plasmid restricted with the same enzymes. Ligation mixture was used to transform *E. coli* competent cells and selection was done in LB-KmGm plates. The resulting plasmid, pTn7-M-PEM7-GFP, was used as a template to eliminate the RBS sequence. In order to achieve this, the plasmid was PCR amplified with primers Tn7-PEM7-F/ Tn7-PEM7-R ( $T_m = 58$  °C, 2 min. elongation, Q5 polymerase). The primers were designed to i) amplify the whole plasmid with the exception of the 7-nt Shine Dalgarno motif 5'-AGGAGGA-3' located 7-nt away from the *gfp* start codon, ii) generate a PCR product sharing a 40-bp sequence at both sides of the molecule to allow isothermal assembly of the amplicon. The 3.9 Kb PCR product was purified and subjected to Gibson Assembly and the reaction was transformed into *E. coli*. Selection was made in LB-KmGm plates, thus obtaining the plasmid pTn7-M-PEM7-GFP-RBS<sup>-</sup>. The region between the  $P_{EM7}$  promoter and the end of the *gfp* gene was fully sequenced with primers PS2 and PEM7-F to ensure the correct deletion of the RBS sequence. *E. coli* (pTn7-M-PEM7-GFP-RBS<sup>-</sup>) was used as the donor strain to introduce the mini-transposon in the *attTn7* site of *P. putida* EM42. Both strains and the helper strains *E. coli* HB101 (pRK600) and *E. coli* (pTNS2) were used in a tetra-parental mating followed by selection in M9-citrate-Gm solid media. Colonies were streaked in the same media and subjected to two diagnostic PCRs to check the mini-transposon insertion. PCRs with primer pairs PS2/ PP5408-F ( $T_m = 60$  °C, 1 min. 30 seconds elongation) and PEM7-F/Tn7-GlmS ( $T_m = 60$  °C, 1 min. elongation) yielded bands of 2.2 Kb and 1.2 Kb, respectively, confirming the correct integration of the transposon in the *attTn7* locus. The resulting strain *P. putida* EM42::Tn7-M- $P_{EM7}$ -*gfp*-RBS<sup>-</sup> (referred as *P. putida* TA245 in Supplementary Table S2) was transformed by tripartite mating with pSEVA2314-*rec2*-*mutL*<sub>E36K</sub><sup>PP</sup> plasmid. After selection on M9-citrate-KmGm plates, the strain *P. putida* TA245 (pSEVA2314-*rec2*-*mutL*<sub>E36K</sub><sup>PP</sup>) was obtained. Integrity of the constructs described above, either in *E. coli* or *P. putida*, was always checked by miniprep, restriction and agarose gel visualization.

*Oligonucleotide design, recombineering protocol, cycling procedure and screening*

The nine oligonucleotides used in this work for recombineering experiments (SR, NR, RR, PR, CR, RBS-C<sub>6</sub>, RBS-Deg<sub>6</sub>, RBS-C<sub>9</sub>, RBS-Deg<sub>9</sub>) were designed to introduce different allelic changes targeting the lagging strand of the *P. putida* chromosome. Supplementary Table S3 summarizes the main features of each oligonucleotide while complete sequence and additional details can be found in Supplementary Table S1. The recombineering protocol used here relies in the co-expression of the Rec2 recombinase and the MutL<sub>E36K</sub><sup>PP</sup> dominant negative allele from plasmids endowed with the thermo-inducible P<sub>L</sub>/cl857 expression system (pSEVA2214-*rec2-mutL*<sub>E36K</sub><sup>PP</sup>, pSEVA2314-*rec2-mutL*<sub>E36K</sub><sup>PP</sup> or pSEVA2514-*rec2-mutL*<sub>E36K</sub><sup>PP</sup>). The protocol is basically identical to that described previously in (Aparicio et al., 2019b). Overnight cultures of *P. putida* strains harboring the proper plasmid were used to inoculate 20 ml of fresh LB-Km at OD<sub>600</sub> = 0.1 in 100 ml Erlenmeyer flasks. Cultures were incubated at 30 °C with vigorous shaking (170 rpm) until OD<sub>600</sub> ~ 1.0 and flasks were then placed in a water bath at 42 °C for 5 minutes to increase rapidly the temperature and induce the P<sub>L</sub> promoter. Ten additional minutes of incubation at 42 °C was performed in an air shaker at 250 rpm (induction total time at 42 °C= 15 minutes) to trigger the expression of *rec2-mutL*<sub>E36K</sub><sup>PP</sup> genes, followed by 5 minutes in ice to cool down the bacterial culture and stop the induction. In non-induced cultures the heat-shock and cooling down steps were not performed. Competent cells were then prepared transferring 10 ml of each culture to 50-ml conical tubes and centrifuging the cells at 3,220 g/ 5 minutes. Cell pellets were resuspended in 10 ml of 300 mM sucrose and washed two additional times with 5 and 1 ml of the same solution. After centrifugation in a bench-top centrifuge (10,000 rpm, 1 minute), cellular pellets were finally resuspended in 200 µl of 300 mM sucrose and 100 µl of this suspension was added with the recombineering oligonucleotide. For single-oligonucleotide experiments, 1 µl from a 100 µM stock was used (1 µM final concentration). For multiplexed experiments, 10 µl of each oligonucleotide stock at 100 µM (SR, NR, RR, PR and CR) were mixed and 3 µl of this mixture were added to the competent cells (accounting for 0.6 µM of each oligo.). The cell suspension was mixed thoroughly by pipetting, placed in an electroporation cuvette (Bio-Rad, 2 mm-gap width) and electroporated at 2.5 kV in a Micropulser™ device (Bio-Rad Laboratories, Hercules, CA, USA). Cells were immediately inoculated in 5 ml of fresh TB in 100 ml Erlenmeyer flasks and recovered at 30 °C/ 170 rpm. Before plating the cells for screening of allelic replacements, different recovery times and TB additions were used depending on the experiment. For one cycle recombineering experiments, overnight recovery was done in TB for assays with SR and NR

oligonucleotides while for experiments with oligonucleotides RBS-C<sub>6</sub>, RBS-Deg<sub>6</sub>, RBS-C<sub>9</sub> and RBS-Deg<sub>9</sub>, TB supplemented with Km and Gm was preferred. Specifications for cycled recombineering assays (HEMSE) are depicted below.

*High-efficiency multi-site genomic editing protocol*

HEMSE is a cycled recombineering protocol run in a multiplexed fashion. The procedure involves a standard recombineering protocol in which, as explained before, cultures were subjected to electrotransformation with an equimolar mixture of several oligonucleotides. The recovery was performed in TB added with Km in order to maintain the plasmid along the cycles, and the incubation proceeded at 30 °C with vigorous shaking (170 rpm) until an OD<sub>600</sub> ~ 1.0 (Cycle-I). Culture aliquots were withdrawn for screening and the bacterial culture entered in the next round of recombineering by performing induction at 42 °C/ 15 minutes, competent cell preparation, oligonucleotide mixture electroporation and recovery till reaching again a cell density around 1.0 at 600 nm (Cycle-II). Further cycles proceeded in the same way (Fig. 3 of main text). Each cycle took one day in average and recovery, when necessary, was performed overnight at room temperature without shaking to avoid culture overgrowth. When recovery step was completed at the end of the day, cultures were stored at 4 °C overnight. A new cycle was started in the next morning incubating the culture 30 minutes at 30 °C (170 rpm) before the induction step. Screening of allelic changes after recombineering was performed plating aliquots of recovered cultures in the appropriate selective and/or non-selective solid media, as follows:

- In single-oligonucleotide experiments with SR and NR oligonucleotides (one cycle), overnight cultures were plated in LB-Sm (dilutions 10<sup>-4</sup> and 10<sup>-5</sup> for induced cultures and 10<sup>-2</sup> and 10<sup>-3</sup> for non-induced bacteria) and LB-Nal (dilutions 10<sup>-4</sup> and 10<sup>-5</sup> for induced cultures and 10<sup>-2</sup> and 10<sup>-3</sup> for non-induced bacteria), respectively, to estimate the allelic replacements, while dilutions 10<sup>-7</sup> and 10<sup>-8</sup> were done in LB without antibiotics to count viable cells. Plates were incubated 18 h. at 30 °C and CFUs annotated.
- In single-oligonucleotide experiments with RBS-C<sub>6</sub>, RBS-Deg<sub>6</sub>, RBS-C<sub>9</sub>, RBS-Deg<sub>9</sub> oligos (one cycle), cultures recovered overnight were plated on 150 mm width LB-KmGm-activated charcoal

plates using  $10^{-6}$  dilutions. This allowed an average of 500 colonies per plate. To facilitate the identification of colonies displaying low levels of fluorescence, plates were incubated at 30 °C for 5 days. Fluorescent colonies were streaked in the same media and insertion of putative ribosome binding sites upstream the *gfp* gene were checked by PCR amplifying this DNA region with primers PS2/ PP5408-F ( $T_m = 60$  °C, 1 min. 30 seconds elongation, 1.0 Kb product) and sequencing the amplicon with primer ME-I-Gm-ExtR. Non-redundant clones with different sequences inserted were selected and glycerol stocks made prior characterization by flow cytometry.

- Allelic replacements in HEMSE experiments were screened after recovery steps ( $OD_{600} \sim 1.0$ ) of cycle-I, cycle-V and cycle-X. Viable cells were estimated plating dilutions  $10^{-7}$  and  $10^{-8}$  in LB plates. Single mutants coming from SR-, NR-, RR- and PR-mediated recombineering were analyzed by plating dilutions  $10^{-4}$  and  $10^{-5}$  in LB-Sm, LB-Nal, LB-Rif and LB-5FOA-Ura plates. Plates were incubated 24 h at 30 °C and total CFUs of single mutants ( $Sm^R$ ,  $Nal^R$ ,  $Rif^R$  and  $5FOA^R$ ) and viable cells were taken. Twenty  $5FOA^R$  colonies were replicated on M9-citrate and M9-citrate-5FOA-Ura plates in order to discriminate authentic *pyrF* mutants ( $5FOA^R/Ura^-$ ) from spontaneous  $5FOA^R$  mutants ( $5FOA^R/Ura^+$ ), as stated in (Galvao and de Lorenzo, 2005; Aparicio et al., 2016). Colonies grown on both media were discounted of the total  $5FOA^R$  numbers as *pyrF*-unrelated, spontaneous mutants. Dilutions  $10^{-6}$  in LB-benzoate plates allowed the estimation of *catA-I*<sup>-</sup> mutants simply by counting the dark-brown colonies appeared after 10 days of incubation at 30 °C. *catA-I*<sup>-</sup> mutants accumulate catechol, which turns into brown intermediates after spontaneous oxidation and polymerization (Jimenez et al., 2014). In previous assays aimed to obtain *catA-I*<sup>-</sup> mutants through recombineering with CR oligo, it was noticed that long incubations were necessary to appreciate the colored phenotype in solid media (Fig. S2). The observed dark-brown colonies were always *catA-I*<sup>-</sup> mutants, as was demonstrated by amplification of *catA-I* gene (primers *catA-F/catA-R*,  $T_m$  55 °C, 1 minute elongation) and sequencing of the 0.5 Kb amplicon with primer *catA-F* (data not shown) in 20 selected colonies. Multiple gene editions were also analyzed plating cultures from cycles I, V and X on LB solid media supplemented either with Sm+Nal+ Rif+5FOA+Ura (four editions mediated by SR, NR, RR and PR oligonucleotides), 24 incubation at 30 °C, or with Sm+Nal+Rif+5FOA+Ura+benzoate (five editions mediated by the 5 oligonucleotides used in this study), 10 days incubation at 30 °C. For

this last experiment, there were considered quintuple mutants those colonies displaying resistance to Sm, Nal, Rif and 5FOA and also showing the characteristic brown phenotype of *catA-I*<sup>-</sup> mutants. The recombineering frequency (RF) was calculated as the ratio between the number of colonies showing a given phenotype and the number of viable cells within the experiment, being this ratio normalized to 10<sup>9</sup> viable cells for graphic representation.

In order to check the accuracy of the allelic replacements, 18 colonies showing the quintuple mutant phenotype (Sm<sup>R</sup>, Nal<sup>R</sup>, Rif<sup>R</sup>, 5FOA<sup>R</sup> and catechol accumulation) were checked by PCR amplification and sequencing of the target genes. For each bacterial clone, five different PCRs were set up to amplify: *rpsL* (primers *rpsL-Fw/ rpsL-Rv*, Tm 57 °C, 45 seconds elongation, 0.8 Kb product), *gyrA* (primers *gyrA-Fw/ gyrA-Rv*, Tm 57 °C, 45 seconds elongation, 0.4 Kb product), *rpoB* (primers *rpoB-F/rpoB-R*, Tm 57 °C, 45 seconds elongation, 0.4 Kb product), *pyrF* (primers *pyrF-F/pyrF-R*, Tm 52 °C, 1 minute elongation, 1.2 Kb product) and *catA-I* (primers *catA-F/catA-R*, Tm 55 °C, 1 minute elongation, 0.5 Kb product). The purified PCR products were sequenced with the putative forward primers and the sequence analysed for the expected changes mediated by recombineering. All clones analysed (n=18; 100%) showed the correct changes, demonstrating that the observed phenotypes corresponded to mutations mediated by the HEMSE procedure. Single allelic replacements in HEMSE experiments were not confirmed by PCR and sequencing since previous works showed that virtually 100% of Sm<sup>R</sup>, Nal<sup>R</sup> and *pyrF*<sup>-</sup> mutants obtained by recombineering with oligos SR, NR and LM (almost identical to RR oligo used in this work) harbored the expected changes in the target genes *rpsL*, *gyrA* and *pyrF* (Ricaurte et al., 2018; Aparicio et al., 2019a). Preliminary studies in this work showed, on the other hand, that single Rif<sup>R</sup> mutants also displayed 100% accuracy in the expected mutations of the target gene *rpoB* (data not shown). As explained before, *catA-I*<sup>-</sup>, dark-brown colonies were also analyzed by PCR and sequencing in previous test experiments (data not shown), with analogous results.

#### *Flow cytometry*

The visual selection of fluorescent colonies from recombineering experiments with oligos RBS-Deg6 and RBS-Deg9 gave rise to a collection of 31 RBS insertion mutants showing a wide variety of fluorescent signals. Together with the negative controls of *P. putida* TA245 (insertion of Tn7-M-



$P_{EM7-gfp-RBS^-}$ ) and *P. putida* EM42 (no *gfp* gene), a total of 33 strains were characterized for GFP production. Each strain was inoculated from glycerol stocks in 2 ml of LB-KmGm (*P. putida* EM42 in LB; *P. putida* TA245 in LB-Gm) and cultured at 30 °C/ 170 rpm. 0.5 ml of overnight cultures ( $OD_{600} \sim 2-3$ ) were centrifuged and resuspended in 1 ml of filtered Phosphate Buffered Saline (PBS) 1X (8 mM  $Na_2HPO_4$ , 1.5mM  $KH_2PO_4$ , 3 mM KCl, 137 mM NaCl, pH.7.0). Fifty  $\mu$ l of each suspension was added to 450  $\mu$ l of PBS 1X to obtain cellular samples with  $OD_{600} \sim 0.1-0.15$ . Samples were analyzed in a MACSQuant<sup>TM</sup> VYB cytometer (Miltenyi Biotec, Bergisch Gladbach, Germany) to quantify the emission of fluorescence as indicated in (Martinez-Garcia et al., 2014). GFP was excited at 488 nm and the fluorescence signal was recovered with a  $525\pm 40$  nm band-pass filter. For each sample, at least 100,000 events were analyzed and the FlowJo v. 9.6.2 software (FlowJo LLC, Ashland, OR, USA) was used to process the results. Population was gated to eliminate background noise and the median of the GFP-A channel of two biological replicas was used for graphical representation.

### Data and Software Availability

GenBank accession numbers for the plasmids used in this study are the following:

pSEVA2214-*rec2-mut*<sub>E36K</sub><sup>PP</sup> (MN688223)

pSEVA2314-*rec2-mut*<sub>E36K</sub><sup>PP</sup> (MN688222)

pSEVA2514-*rec2-mut*<sub>E36K</sub><sup>PP</sup> (MN180222)

## SUPPLEMENTARY FIGURES

**Figure S1.** Rec2-independent editing in HEMSE assays (related to Fig. 4 of main text)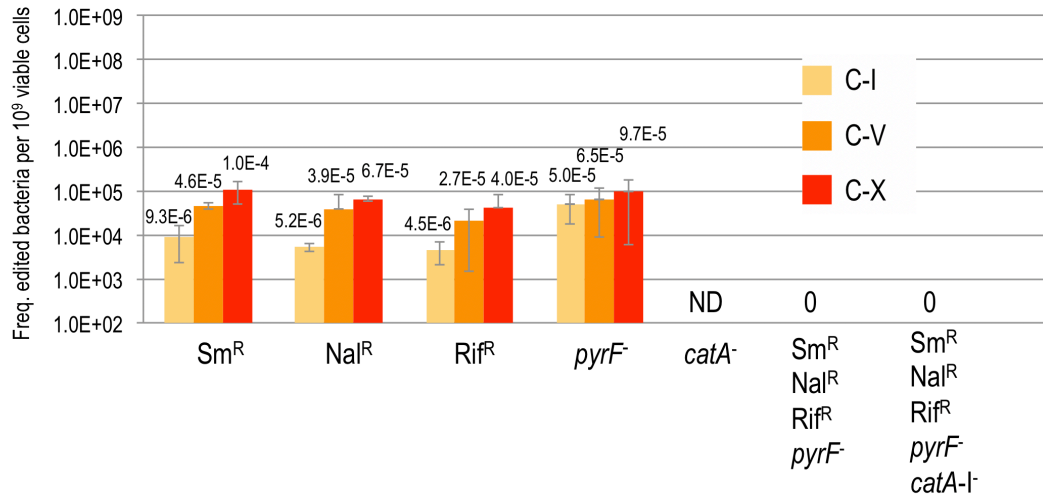

Editing efficiencies of single and multiple changes in the control strain *P. putida* EM42 harboring the empty plasmid pSEVA2314 were assayed applying 10 cycles of HEMSE and an equimolar mixture of oligos SR, NR, RR, PR and CR, following the same procedure explained in Figure 4A and 4B. See more details in Transparent Methods section. Allelic replacements of *catA-I* gene were not determined in these assays (ND), while multiple editions could not be detected (0).

**Figure S2.** Phenotype of *P. putida* EM42 *catA-I*<sup>-</sup> strain (related to Fig. 4 of main text).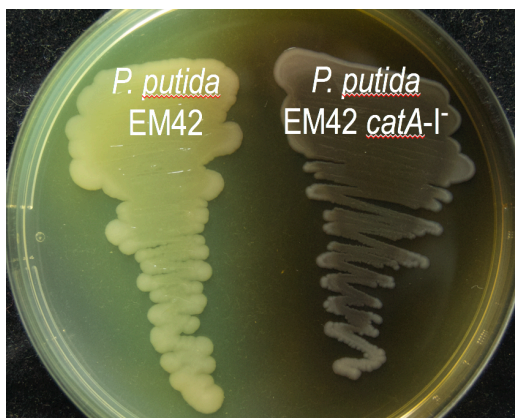

*P. putida* EM42 (pSEVA2314-*rec2-mut*<sub>L36K<sup>PP</sup></sub>) was subjected to recombineering with CR oligonucleotide (see Transparent Methods section). Three stop codons were inserted in the *catA-I* ORF, generating a mutant strain in which the metabolism of benzoic acid is impaired, leading to accumulation of catechol (Jimenez et al., 2014). Upon spontaneous oxidation and polymerization, catechol derivatives exhibit a characteristic dark-brown colour. *P. putida* EM42 and the *catA-I* mutant were grown in LB-Agar supplemented with benzoate 5 mM and incubated 10 days at 30 °C to allow the visualization of the colored phenotype.

## SUPPLEMENTARY TABLES

**SUPPLEMENTARY TABLE S1.** Oligonucleotides used in this study (related to Fig. 2 and Fig. 5 of main text).

| Name    | <sup>(a)</sup> Sequence (5' → 3')                                                                      | Usage / Source                                                                                                                                     |
|---------|--------------------------------------------------------------------------------------------------------|----------------------------------------------------------------------------------------------------------------------------------------------------|
| SR      | G*T*C*A*GACGCACACGGCATACTTTACGCAG<br>TGCCGAGTTAGGTTTTGTCGGCGTGGTGGTG<br>TACACACGGGTGCACACGCCACGACGCTGC | Recombineering oligo for <i>rpsL</i> gene: AAA (K43) changed to ACA (T43), mismatch A:G, confers Sm resistance (Ricaurte et al., 2018)             |
| rpsL-Fw | GACATGAAATGTTGCCGATG                                                                                   | To amplify and sequence part of <i>rpsL</i> gene of <i>P. putida</i> (Ricaurte et al., 2018)                                                       |
| rpsL-Rv | CTGTTCTTGCGTGCTTTGAC                                                                                   | With rpsL-Fw, to amplify part of <i>rpsL</i> gene of <i>P. putida</i> (Ricaurte et al., 2018)                                                      |
| NR      | AACGAGAACGGCTGGGCCATACGCACGATGG<br>TATTGTAGACCGCAGTGTCCCGTGCGGGTG<br>GTA                               | Recombineering oligo for <i>gyrA</i> gene: GAC (D87) changed to AAT (N87), mismatches G:T and C:A, confers Nal resistance (Aparicio et al., 2019b) |
| gyrA-F  | GGCCAAAGAAATCCTCCCGGTCAA                                                                               | To amplify and sequence part of <i>gyrA</i> gene of <i>P. putida</i> (Aparicio et al., 2019b)                                                      |
| gyrA-R  | AGCAGGTTGGAATACGCGTCCG                                                                                 | To amplify and sequence part of <i>gyrA</i> gene of <i>P. putida</i> (Aparicio et al., 2019b)                                                      |
| RR      | TCCGAGAGAGGGTTGTTCTGGTCCATGAACA<br>GGGACAGCTGGCTGGAACCGAAGAACTCT                                       | Recombineering oligo for <i>rpoB</i> gene: CAG (Q518) changed to CTG (L518), mismatch A:A, confers Rif resistance. This work                       |
| rpoB-F  | CCTGGGTAACCGTCGCGTACGGTG                                                                               | To amplify and sequence part of <i>rpoB</i> gene of <i>P. putida</i> . This work                                                                   |
| rpoB-R  | CGCCTTCCTTCACCACGCGGTACG                                                                               | To amplify and sequence part of <i>rpoB</i> gene of <i>P. putida</i> . This work                                                                   |
| PR      | AGGTCCAGGAACACTTCGAAGCCCTTGTCACA<br>CAGGGTTTAGACAATGCCCGAAGCGCTGCTG                                    | Recombineering oligo for <i>pyrF</i> gene: GAA (E50) changed to TAA                                                                                |

|              |                                                                                                    |                                                                                                                                                                 |
|--------------|----------------------------------------------------------------------------------------------------|-----------------------------------------------------------------------------------------------------------------------------------------------------------------|
|              | GTGAACAGCTCCTTGCCA                                                                                 | (Stop), mismatch A:G, confers 5FOA resistance and uracil auxotrophy. This work                                                                                  |
| pyrF-F       | CGAGGGCTATGATGAGTATC                                                                               | To amplify and sequence the <i>pyrF</i> gene of <i>P. putida</i> (Aparicio et al., 2016)                                                                        |
| pyrF-R       | GTCAGGTGAAGAGCAAAGAG                                                                               | To amplify and sequence the <i>pyrF</i> gene of <i>P. putida</i> (Aparicio et al., 2016)                                                                        |
| CR           | GCAGCACGCGCAGAATGATCTGCTTGAAGCG<br>CGGGTTTCCCTATTATCAATTCGGCATGGTCCA<br>GGCCAGCTACCCGGTTGAAGAAGGCT | Recombineering oligo for <i>catA-I</i> gene: insertion of three stop codons truncates the ORF, giving rise to brown colonies in presence of benzoate. This work |
| catA-F       | AACTCGTCCTCGGTAATCTC                                                                               | To amplify and sequence part of <i>catA-I</i> gene of <i>P. putida</i> . This work                                                                              |
| catA-R       | CAGCAATCAAGGAGATAACC                                                                               | To amplify and sequence part of <i>catA-I</i> gene of <i>P. putida</i> . This work                                                                              |
| Tn7-PEM7-F   | AAAACATATGAGTAAAGGAGAAGAACTTTTCA                                                                   | To remove RBS sequence from pTn7-M-PEM7-GFP by Gibson Assembly. This work                                                                                       |
| Tn7-PEM7-R   | AACTCCAGTGAAAAGTTCTTCTCCTTTACTCAT<br>ATGTTTTAAGCTTGCATGCCTGCAGGTCG                                 | To remove RBS sequence from pTn7-M-PEM7-GFP by Gibson Assembly. This work                                                                                       |
| PEM7-F       | AATACGACAAGGTGAGGAAC                                                                               | To amplify and sequence from P <sub>EM7</sub> promoter. This work                                                                                               |
| PP5408-F     | CGATTCATCAGGTTGGATTCCG                                                                             | To amplify and sequence mini-Tn7 insertions from PP_5408 locus of <i>P. putida</i> . This work                                                                  |
| Tn7-GlmS     | AATCTGGCCAAGTCGGTGAC                                                                               | To amplify and sequence mini-Tn7 insertions from <i>glmS</i> gene of <i>P. putida</i> (Lambertsen et al., 2004)                                                 |
| PS2          | GCGGCAACCGAGCGTTC                                                                                  | To amplify and sequence from T <sub>0</sub> terminator (Silva-Rocha et al., 2013)                                                                               |
| ME-I-Gm-ExtR | GTTCTGGACCAGTTGCGTGAG                                                                              | To amplify and sequence from mini-Tn7 Gm resistance gene                                                                                                        |

|                      |                                                                                        |                                                                                                                                                                                 |
|----------------------|----------------------------------------------------------------------------------------|---------------------------------------------------------------------------------------------------------------------------------------------------------------------------------|
|                      |                                                                                        | (Martinez-Garcia et al., 2014)                                                                                                                                                  |
| RBS-C <sub>6</sub>   | TCTAGAGTCGACCTGCAGGCATGCAAGCTTA<br><b>GGAGG</b> AAAAACATATGAGTAAAGGAGAAGAA<br>CTTTT    | Recombineering oligo to insert a consensus 6 nucleotide RBS sequence upstream the <i>gfp</i> gene in strains Tn7-M-P <sub>EM7-gfp</sub> -RBS <sup>-</sup> . This work           |
| RBS-Deg <sub>6</sub> | TCTAGAGTCGACCTGCAGGCATGCAAGCTTR<br><b>RRRRR</b> AAAAACATATGAGTAAAGGAGAAGAAC<br>TTTT    | Recombineering oligo to insert a degenerated (R=A,G) 6 nucleotide RBS sequence upstream the <i>gfp</i> gene in strains Tn7-M-P <sub>EM7-gfp</sub> -RBS <sup>-</sup> . This work |
| RBS-C <sub>9</sub>   | TCTAGAGTCGACCTGCAGGCATGCAAGCTTTA<br><b>AGGAGGT</b> AAAAACATATGAGTAAAGGAGAAGA<br>ACTTTT | Recombineering oligo to insert a consensus 9 nucleotide RBS sequence upstream the <i>gfp</i> gene in strains Tn7-M-P <sub>EM7-gfp</sub> -RBS <sup>-</sup> . This work           |
| RBS-Deg <sub>9</sub> | TCTAGAGTCGACCTGCAGGCATGCAAGCTTTA<br><b>RRRRRRR</b> AAAAACATATGAGTAAAGGAGAAGA<br>ACTTTT | Recombineering oligo to insert a degenerated (R=A,G) 9 nucleotide RBS sequence upstream the <i>gfp</i> gene in strains Tn7-M-P <sub>EM7-gfp</sub> -RBS <sup>-</sup> . This work |

<sup>(a)</sup> Asterisks denote phosphorothioate bonds. Single changes introduced by recombineering oligonucleotides SR, NR, RR and PR are highlighted in bold. The three stop codons inserted by oligo CR appear in blue. The sequences encompassing the stretch inserted by the four RBS-X oligos are shown in red color.

**SUPPLEMENTARY TABLE S2.** Bacterial strains and plasmids used in this work (related to Fig. 2 of main text)

| Strain or plasmid                                       | Relevant characteristics <sup>a</sup>                                                                                                                                                                                                  | Reference or source                |
|---------------------------------------------------------|----------------------------------------------------------------------------------------------------------------------------------------------------------------------------------------------------------------------------------------|------------------------------------|
| <i>Escherichia coli</i>                                 |                                                                                                                                                                                                                                        |                                    |
| CC118                                                   | Cloning host; $\Delta(ara-leu)$ <i>araD</i> $\Delta lacX74$ <i>galE galK</i><br><i>phoA thiE1 rpsE(Sp<sup>R</sup>) rpoB(Rif<sup>R</sup>) argE(Am) recA1</i>                                                                            | (Manoil and Beckwith, 1985)        |
| HB101                                                   | Helper strain used for conjugation; $F^- \lambda^- hsdS20(rB^-$<br>$mB^-) recA13 leuB6(Am) araC14 \Delta(gpt-proA)62 lacY1$<br><i>galK2(Oc) xyl-5 mtl-1 thiE1 rpsL20(Sm<sup>R</sup>) glnX44 (AS)</i>                                   | (Boyer and Roulland-Dussoix, 1969) |
| CC118 $\lambda$ pir                                     | CC118, $\lambda$ pir lysogen                                                                                                                                                                                                           | (Herrero et al., 1990)             |
| <i>Pseudomonas putida</i>                               |                                                                                                                                                                                                                                        |                                    |
| EM42                                                    | KT2440 derivative; $\Delta$ prophage1 $\Delta$ prophage4<br>$\Delta$ prophage3 $\Delta$ prophage2 $\Delta$ Tn7 $\Delta endA-1 \Delta endA-2$<br>$\Delta hsdRMS \Delta flagellum \Delta Tn4652$                                         | (Martinez-Garcia et al., 2014)     |
| TA238                                                   | EM42 derivative; <i>rpsL<sup>-</sup>(Sm<sup>R</sup>) gyrA<sup>-</sup>(Nal<sup>R</sup>) rpoB<sup>-</sup>(Rif<sup>R</sup>)</i><br><i>pyrF<sup>-</sup>(5FOA<sup>R</sup>) catA-I<sup>-</sup></i>                                           | This work                          |
| TA245                                                   | EM42 derivative with mini-Tn7-M- $P_{EM7-gfp-RBS^-}$<br>transposon inserted in the <i>attTn7</i> site                                                                                                                                  | This work                          |
| Plasmids                                                |                                                                                                                                                                                                                                        |                                    |
| pSEVA2314                                               | Inducible expression vector; <i>oriV(pBBR1)</i> ; cargo<br>[ $P_L/cl857$ ]; standard multiple cloning site; Km <sup>R</sup>                                                                                                            | (Aparicio et al., 2019a)           |
| pSEVA2214- <i>rec2-mutL<sub>E36K</sub><sup>PP</sup></i> | pSEVA2214 derivative bearing the <i>rec2</i> recombinase<br>and <i>mutL<sub>E36K</sub><sup>PP</sup></i> allele ; <i>oriV(RK2)</i> ; cargo [ $cl857-P_L \rightarrow$<br><i>rec2-mutL<sub>E36K</sub><sup>PP</sup></i> ]; Km <sup>R</sup> | This work<br>GenBank n° MN688223   |
| pSEVA2314- <i>rec2-mutL<sub>E36K</sub><sup>PP</sup></i> | pSEVA2314 derivative bearing the <i>rec2</i> recombinase<br>and <i>mutL<sub>E36K</sub><sup>PP</sup></i> allele ; <i>oriV(pBBR1)</i> ; cargo<br>[ $P_L/cl857 \rightarrow rec2-mutLE36KPP$ ]; Km <sup>R</sup>                            | This work<br>GenBank n° MN688222   |

---

|                                                                    |                                                                                                                                                                                                                                                                 |                                                              |
|--------------------------------------------------------------------|-----------------------------------------------------------------------------------------------------------------------------------------------------------------------------------------------------------------------------------------------------------------|--------------------------------------------------------------|
| pSEVA2514- <i>rec2</i> - <i>mutL</i> <sub>E36K</sub> <sup>PP</sup> | pSEVA2514 derivative bearing the <i>rec2</i> recombinase and <i>mutL</i> <sub>E36K</sub> <sup>PP</sup> allele ; <i>oriV</i> (RFS1010); cargo [ <i>cl857</i> - <i>P<sub>L</sub></i> → <i>rec2</i> - <i>mutL</i> <sub>E36K</sub> <sup>PP</sup> ]; Km <sup>R</sup> | (Aparicio et al., 2019b)<br>GenBank n° MN180222              |
| pSEVA637                                                           | <i>oriV</i> (pBBR1); cargo [ <i>gfp</i> ]; Gm <sup>R</sup>                                                                                                                                                                                                      | (Silva-Rocha et al., 2013)<br>(Martinez-Garcia et al., 2015) |
| pSEVA237R-PEM7                                                     | <i>oriV</i> (pBBR1); cargo [ <i>P<sub>EM7</sub></i> → <i>mCherry</i> ]; Km <sup>R</sup>                                                                                                                                                                         | (Silva-Rocha et al., 2013)<br>(Martinez-Garcia et al., 2015) |
| pSEVA237-PEM7                                                      | <i>oriV</i> (pBBR1); cargo [ <i>P<sub>EM7</sub></i> → <i>gfp</i> ]; Km <sup>R</sup>                                                                                                                                                                             | This work                                                    |
| pTn7-M                                                             | <i>oriV</i> (R6K); mini-Tn7 transposon; standard multiple cloning site; Km <sup>R</sup> Gm <sup>R</sup>                                                                                                                                                         | (Zobel et al., 2015)                                         |
| pTn7-M-PEM7-GFP                                                    | pTn7-M derivative with <i>P<sub>EM7</sub></i> - <i>gfp</i> in the mini-Tn7 transposon; <i>oriV</i> (R6K); Km <sup>R</sup> Gm <sup>R</sup>                                                                                                                       | This work                                                    |
| pTn7-M-PEM7-GFP-RBS <sup>-</sup>                                   | pTn7-M-PEM7-GFP derivative lacking the <i>gfp</i> RBS; <i>oriV</i> (R6K); Km <sup>R</sup> Gm <sup>R</sup>                                                                                                                                                       | This work                                                    |
| pRK600                                                             | Helper plasmid used for conjugation; <i>oriV</i> (ColE1), RK2 ( <i>mob</i> <sup>+</sup> <i>tra</i> <sup>+</sup> ); Cm <sup>R</sup>                                                                                                                              | (Kessler et al., 1992)                                       |
| pTNS2                                                              | Helper plasmid for mini-Tn7 transposition; <i>oriV</i> (R6K), TnsABC+D specific transposition pathway; Ap <sup>R</sup>                                                                                                                                          | (Choi et al., 2005)                                          |

---

<sup>a</sup> Antibiotic markers: Ap, ampicillin; Cm, chloramphenicol; Km, kanamycin; 5FOA, 5-fluoro-orotic acid; Gm, gentamicin; Nal, nalidixic acid; Rif, rifampicin; Sm, streptomycin; Sp, spectinomycin.

**SUPPLEMENTARY TABLE S3.** Main features of recombineering oligonucleotides used in this study (related to Fig. 2 of main text)

| Name                 | P-thioate bonds | Length | Target gene    | Change/mismatch        | MMR sensitivity | $\Delta G$ (kcal/mol) | Phenotype                            |
|----------------------|-----------------|--------|----------------|------------------------|-----------------|-----------------------|--------------------------------------|
| SR                   | Four at 5'-end  | 94     | <i>rpsL</i>    | A→C/A:G                | Low             | - 20.79               | Sm <sup>R</sup>                      |
| NR                   | None            | 65     | <i>gyrA</i>    | G→A/ G:T<br>C→T/ C:A   | High            | - 11.84               | Nal <sup>R</sup>                     |
| RR                   | None            | 60     | <i>rpoB</i>    | A→T/ A:A               | High            | - 7.26                | Rif <sup>R</sup>                     |
| PR                   | None            | 81     | <i>pyrF</i>    | G→T/ G:A               | Low             | - 14.03               | 5-FOA <sup>R</sup> /Ura <sup>-</sup> |
| CR                   | None            | 89     | <i>catA-I</i>  | Insertion 3 Stops      | Low             | - 12.84               | Catechol accumulation (Brown color)  |
| RBS-C <sub>6</sub>   | None            | 67     | <i>gfp</i> UTR | Insertion 7 nt         | Low             | - 4.94                | Fluorescent                          |
| RBS-Deg <sub>6</sub> | None            | 67     | <i>gfp</i> UTR | Insertion 7 nt (deg.)  | Low             | Variable              | Fluorescent                          |
| RBS-C <sub>9</sub>   | None            | 70     | <i>gfp</i> UTR | Insertion 10 nt        | Low             | - 4.59                | Fluorescent                          |
| RBS-Deg <sub>9</sub> | None            | 70     | <i>gfp</i> UTR | Insertion 10 nt (deg.) | Low             | Variable              | Fluorescent                          |

## REFERENCES

- Aparicio, T., de Lorenzo, V., and Martinez-Garcia, E. (2019a) Improved thermotolerance of genome-reduced *Pseudomonas putida* EM42 enables effective functioning of the P<sub>L</sub>/cI857 System. *Biotechnol J* **14**: e1800483.
- Aparicio, T., Jensen, S.I., Nielsen, A.T., de Lorenzo, V., and Martinez-Garcia, E. (2016) The Ssr protein (T1E\_1405) from *Pseudomonas putida* DOT-T1E enables oligonucleotide-based recombineering in platform strain *P. putida* EM42. *Biotechnol J* **11**: 1309-1319.
- Aparicio, T., Nyerges, A., Nagy, I., Pal, C., Martinez-Garcia, E., and de Lorenzo, V. (2019b) Mismatch repair hierarchy of *Pseudomonas putida* revealed by mutagenic ssDNA recombineering of the *pyrF* gene. *Environ Microbiol* doi: 10.1111/1462-2920.14814.
- Boyer, H.W., and Roulland-Dussoix, D. (1969) A complementation analysis of the restriction and modification of DNA in *Escherichia coli*. *J Mol Biol* **41**: 459-472.
- Choi, K.H., Gaynor, J.B., White, K.G., Lopez, C., Bosio, C.M., Karkhoff-Schweizer, R.R., and Schweizer, H.P. (2005) A Tn7-based broad-range bacterial cloning and expression system. *Nat Methods* **2**: 443-448.



- Galvao, T.C., and de Lorenzo, V. (2005) Adaptation of the yeast URA3 selection system to Gram-negative bacteria and generation of a  $\Delta betCDE$  *Pseudomonas putida* strain. *Appl Environ Microbiol* **71**: 883-892.
- Herrero, M., de Lorenzo, V., and Timmis, K.N. (1990) Transposon vectors containing non-antibiotic resistance selection markers for cloning and stable chromosomal insertion of foreign genes in gram-negative bacteria. *J Bacteriol* **172**: 6557-6567.
- Jimenez, J.I., Perez-Pantoja, D., Chavarria, M., Diaz, E., and de Lorenzo, V. (2014) A second chromosomal copy of the *catA* gene endows *Pseudomonas putida* mt-2 with an enzymatic safety valve for excess of catechol. *Environ Microbiol* **16**: 1767-1778.
- Kessler, B., de Lorenzo, V., and Timmis, K.N. (1992) A general system to integrate *lacZ* fusions into the chromosomes of gram-negative eubacteria: regulation of the *Pm* promoter of the TOL plasmid studied with all controlling elements in monocopy. *Mol Gen Genet* **233**: 293-301.
- Lambertsen, L., Sternberg, C., and Molin, S. (2004) Mini-Tn7 transposons for site-specific tagging of bacteria with fluorescent proteins. *Environ Microbiol* **6**: 726-32.
- Manoil, C., and Beckwith, J. (1985) *TnphoA*: a transposon probe for protein export signals. *Proc Natl Acad Sci USA* **82**: 8129-8133.
- Martinez-Garcia, E., and de Lorenzo, V. (2012) Transposon-based and plasmid-based genetic tools for editing genomes of gram-negative bacteria. *Methods Mol Biol* **813**: 267-283.
- Martinez-Garcia, E., Aparicio, T., de Lorenzo, V., and Nikel, P.I. (2014) New transposon tools tailored for metabolic engineering of Gram-negative microbial cell factories. *Front Bioeng Biotechnol* **2**: 46.
- Martinez-Garcia, E., Aparicio, T., Goni-Moreno, A., Fraile, S., and de Lorenzo, V. (2015) SEVA 2.0: an update of the Standard European Vector Architecture for de-/re-construction of bacterial functionalities. *Nucleic Acids Res* **43**: D1183-1189.
- Ricaurte, D.E., Martinez-Garcia, E., Nyerges, A., Pal, C., de Lorenzo, V., and Aparicio, T. (2018) A standardized workflow for surveying recombinases expands bacterial genome-editing capabilities. *Microb Biotechnol* **11**: 176-188.
- Sambrook, J., Fritsch, E.F., and Maniatis, T. (1989) *Molecular cloning: a laboratory manual*. Cold Spring Harbor, NY: Cold Spring Harbor Laboratory Press.

- Silva-Rocha, R., Martinez-Garcia, E., Calles, B., Chavarria, M., Arce-Rodriguez, A., de Las Heras, A. et al. (2013) The Standard European Vector Architecture (SEVA): a coherent platform for the analysis and deployment of complex prokaryotic phenotypes. *Nucleic Acids Res* **41**: D666-675.
- Zobel, S., Benedetti, I., Eisenbach, L., de Lorenzo, V., Wierckx, N., and Blank, L.M. (2015) Tn7-based device for calibrated heterologous gene expression in *Pseudomonas putida*. *ACS Synth Biol* **4**: 1341-1351.
